# Supplementary material for: Structural Characterization and Pharmaceutical Evaluation of Telmisartan Hydrochloride Salts
Source: MDPI journal article supplement (doi:10.3390/cryst14020151), 2024-01-31
Supplement: s1 [file s1]

# Structural Characterization and Pharmaceutical Evaluation of Telmisartan Hydrochloride Salts

Yuda Prasetya Nugraha <sup>1,\*</sup>, I Gusti Ayu Nadia Prasta Unique <sup>1</sup>, Tatsuki Miyake <sup>2</sup>, Ridha Rahmah <sup>1</sup>, Indra Indra <sup>1</sup>, Sundani Nuroso Soewandhi <sup>1</sup>, and Hidehiro Uekusa <sup>2,\*</sup>

<sup>1</sup> Department of Pharmaceutics, School of Pharmacy, Bandung Institute of Technology, Bandung 40132, Indonesia

<sup>2</sup> Department of Chemistry, School of Science, Tokyo Institute of Technology, Ookayama 2-12-1, Meguro-ku, Tokyo 152-8551, Japan

\* Correspondence: yudapn@itb.ac.id (Y.P.N.); uekusa@chem.titech.ac.jp (H.U.)

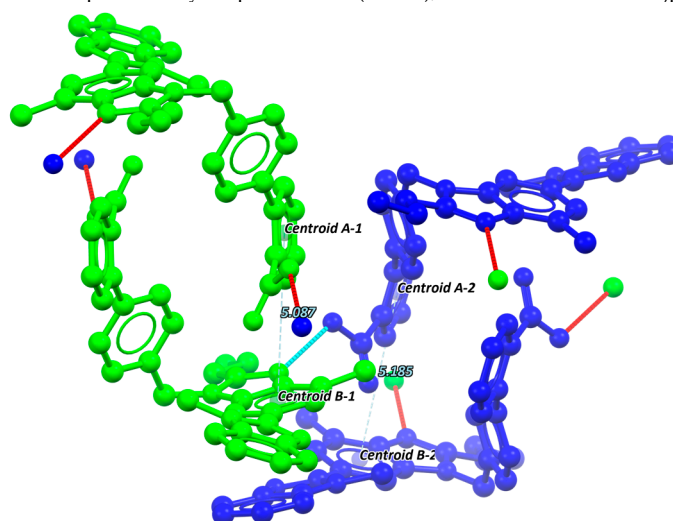

**Figure S1.** Centrosymmetric dimer structure in TELHCl-Hyd.
